# Supplementary material
Source: PubMed Central journal article supplement (PMC6385748)
Supplement: DB180363SupplementaryData.pdf [file DB180363SupplementaryData.pdf]

SUPPLEMENTARY DATA

**Supplementary Figure S1. IP3R1, GRP75 and VDAC1 form a complex and interact with PDK4 in MAM interface, Related to Figure 1.**

(A) Immunoblot of subcellular fractions isolated from C2C12 myotubes.

(B) Validation of interaction between MAM proteins IP3R1, GRP75 and VDAC1 by *in situ* PLA in C2C12 myoblasts (Scale Bars, 20µm).

(C) Co-IP with GRP75 antibody in C2C12 myotubes.

(D) & (F) Validation of IP3R1 and GRP75 knockdown in C2C12 myoblast.

(E) & (G) Evaluation of IP3R1-GRP75-VDAC1 interaction after knocking down IP3R1 or GRP75 by *in situ* PLA in C2C12 myoblast (Scale Bars, 20µm). Following bar graph represents the quantification plot of *in situ* PLA blobs of each respective panel. (Mean ±SD of n=3 of more than 30 cells per experiment; \* $P < 0.05$ , \*\* $P < 0.01$ ; Student's t test)

(H) Evaluation of interaction site of PDK4 with MAM proteins by aligning the *in situ* PLA blobs with mito-GFP using confocal microscope (White Scale Bars, 10µm; Inset-Yellow Scale Bars, 2.5µm).

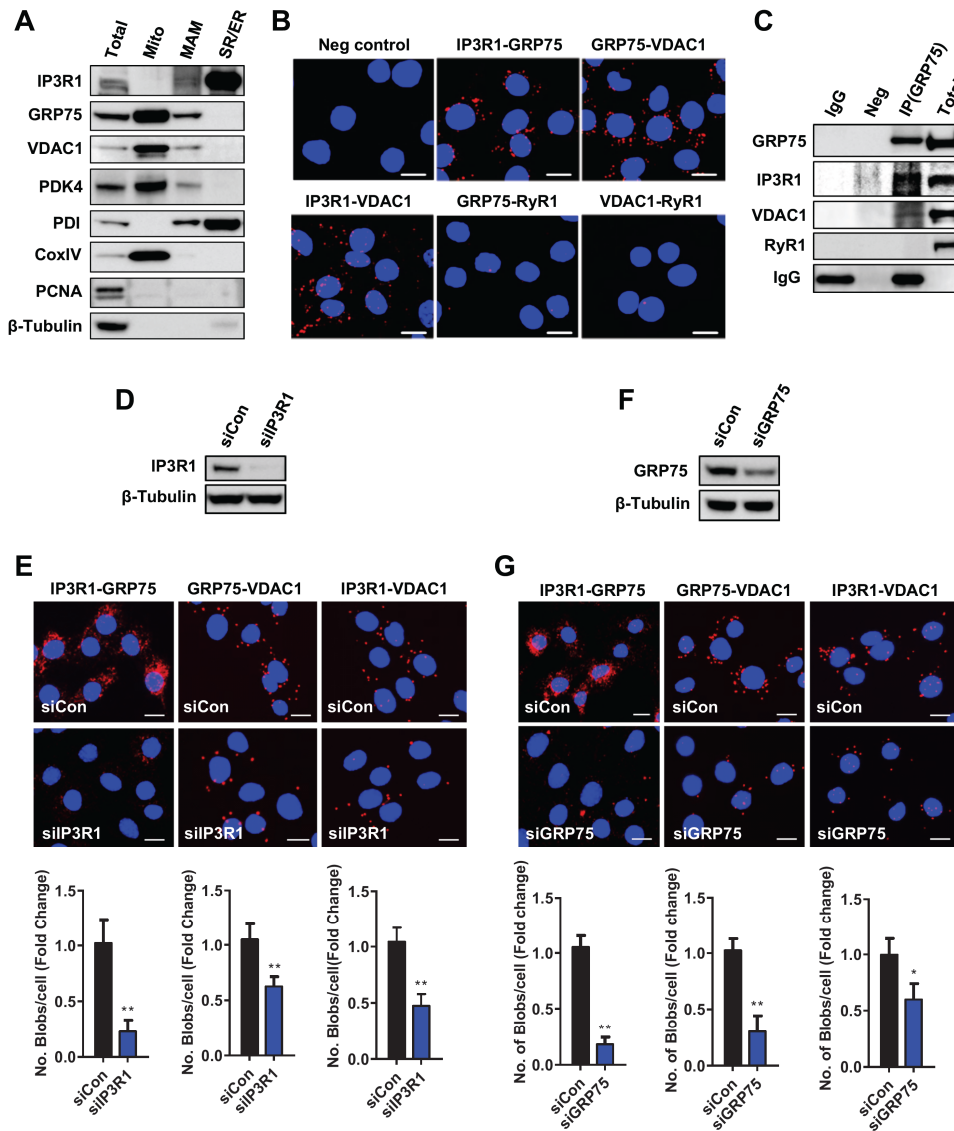

SUPPLEMENTARY DATA

**H**

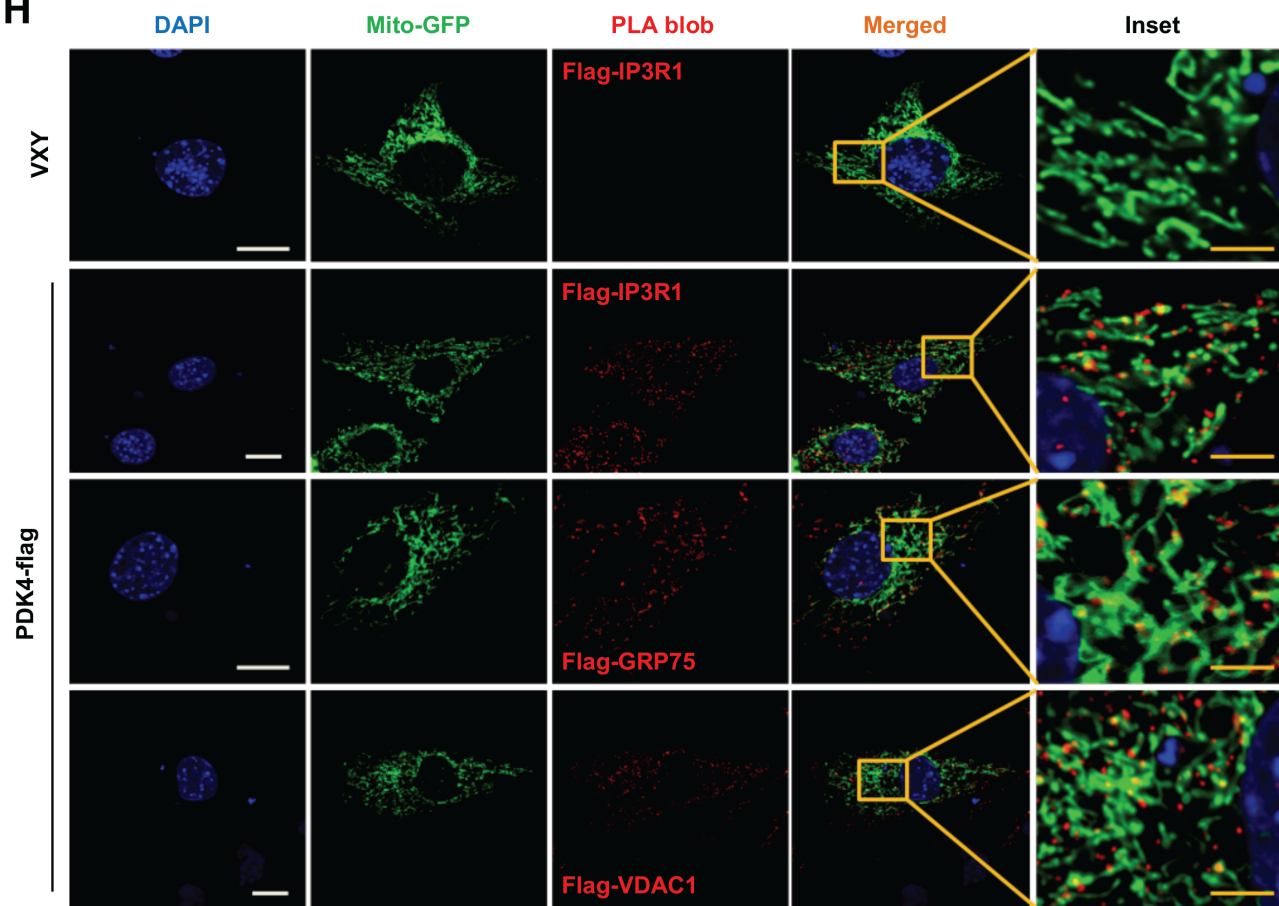

## SUPPLEMENTARY DATA

### **Supplementary Figure S2. Regulation of MAM integrity by PDK4 is PDH independent, Related to Figure 2.**

(A) Dose dependent overexpression  $\Delta$ PDK4-flag and evaluation of PDH phosphorylation in C2C12 myoblast by immunoblot.

(B) Evaluation of interaction between PDHE1 $\alpha$  and IP3R1/VDAC1 by *in situ* PLA in C2C12 myoblast. Interaction between PDHE1 $\alpha$  and PDK2 in absence or presence of siPDHE1 $\alpha$  was used as negative (-ve) and positive (+ve) control respectively (Scale Bars, 20 $\mu$ m).

(C) Validation of PDHE1 $\alpha$  knockdown by immunoblot.

(D) Evaluation of IP3R1-GRP75-VDAC1 interaction in PDHE1 $\alpha$  knockdown C2C12 myoblast by *in situ* PLA (Scale Bars, 20 $\mu$ m). Following bar graph represents the quantification plot of *in situ* PLA blobs of each respective panel. (Mean  $\pm$ SD of over 30 cells for each condition; ns –no significance; Student's t test).

(E) Evaluation of IP3R1 and VDAC1 interaction in VXY or PDK4-flag expressing C2C12 myoblasts in absence or presence of siPDHE1 $\alpha$  by *in situ* PLA (Scale Bars, 20 $\mu$ m). (Below) Quantification (Mean  $\pm$ SD of over 30 cells for each condition; \*\* $P < 0.01$ ; ns – no significance; one-way ANOVA)

SUPPLEMENTARY DATA

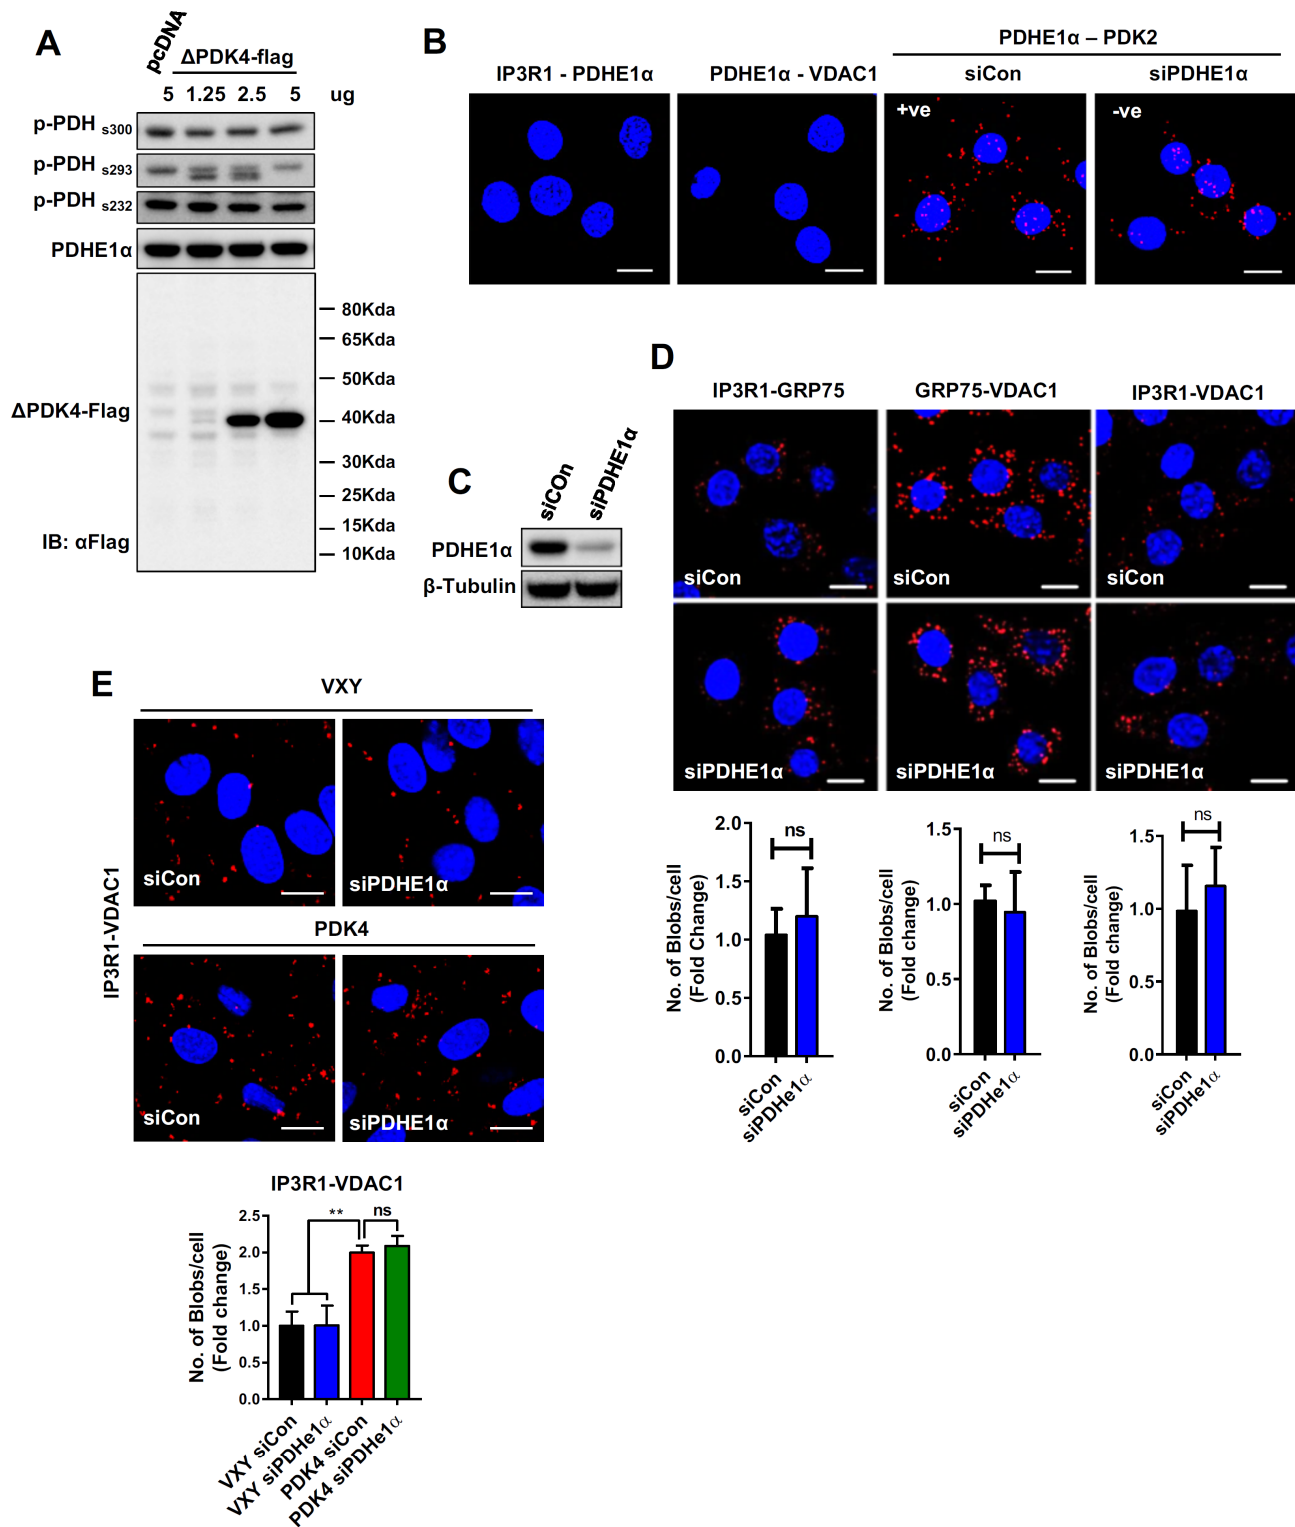

## SUPPLEMENTARY DATA

### **Supplementary Figure S3. Saturated fatty acid palmitate enhanced MAM formation in skeletal muscle cells, Related to Figure 3.**

(A) PDKs protein expression level after 0.4mM Pal/BSA treatment for 16 h in C2C12 myotubes.

(B) Quantification of figure A (Mean  $\pm$ SD of n=3; \* $P$ <0.05; Student's t test)

(C) Immunoblot of subcellular fractions isolated from C2C12 myotubes treated with 0.4mM Pal/BSA for 16 h. (Right) Quantification of MAM fractions (Mean  $\pm$ SD of n=3; \* $P$ <0.05, \*\* $P$ <0.01; Student's t test)

(D) *in situ* PLA of IP3R1-VDAC1 interaction in C2C12 myotubes treated with 0.4mM Pal/BSA at various time points (hour – h) (Scale Bars, 20 $\mu$ m).

(E) Quantification of *in situ* PLA blobs of figure D. (Mean  $\pm$ SD of over 30 cells for each condition; \* $P$ <0.05, \*\* $P$ < 0.01; Student's t test)

(F) IP3R1 and VDAC1 interaction was monitored by *in situ* PLA after treatment of increasing dose of Pal for 16 h (as indicated in the figure) with low glucose (5.5mM) or high glucose (25mM) media (as indicated in the figure) in C2C12 myotubes (Scale Bars, 20 $\mu$ m). (G) Quantification of *in situ* PLA blobs of figure F. (Mean  $\pm$ SD of over 30 cells for each condition; \* $P$ <0.05, \*\* $P$ <0.01, \*\*\* $P$ <0.001; one-way ANOVA)

(H) Transcription factors of PDK4 was evaluated by Immunoblot after incubating with 0.4mM Pal/BSA at various time points in C2C12 myotubes.

(I) Immunoblot of gastrocnemius muscle homogenate isolated from 16 weeks CD and HFD fed mice. (Right) Quantification (Mean  $\pm$ SD of n=2/group; \* $P$ <0.05; Student's t test)

(J) Examination of PDK4 and PDK2 protein expression level after knocking down FOXO1 by immunoblot.

SUPPLEMENTARY DATA

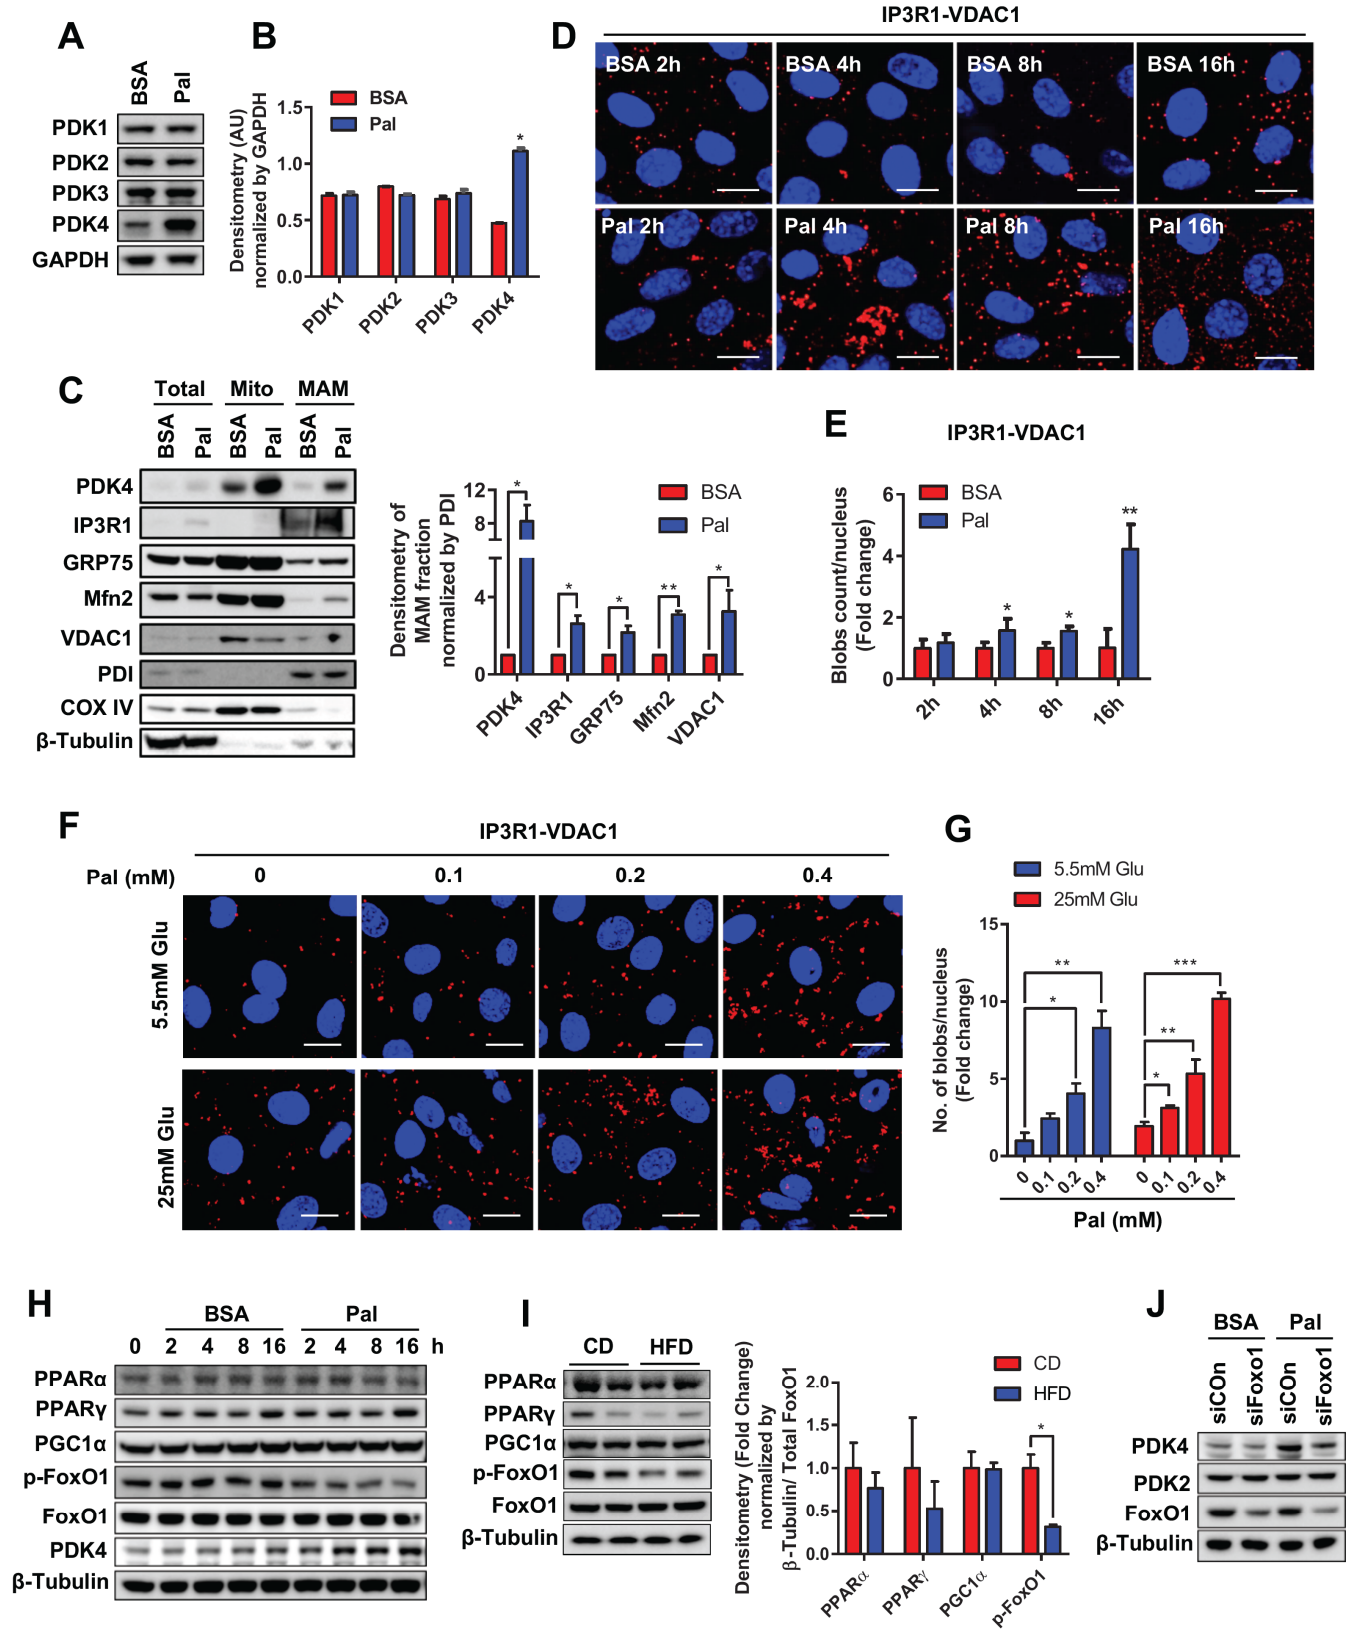

## SUPPLEMENTARY DATA

### **Supplementary Figure S4. PDK4 deficiency reduced high fat diet or palmitate-induced MAM formation without affecting the expression levels of MAM and mitochondrial dynamics related proteins, Related to Figure 4.**

- (A) Evaluation of total protein expression levels of indicated MAM resident proteins in gastrocnemius muscle isolated from CD or HFD fed WT or *Pdk4*<sup>-/-</sup> mice by immunoblot.
- (B) Quantification of figure A (Mean ±SD of n=3; \*\**P*<0.01, ns – no significance; one-way ANOVA)
- (C) & (D) Evaluation of interaction between IP3R1 and GRP75/VDAC1 by *in situ* PLA in siCon/siPDK4 transfected C2C12 myotubes after incubating with 0.4mM Pal/BSA for 16 h. (Right) Quantification of *in situ* PLA blobs of each respective panel (Scale Bars, 10µm) (Mean ±SD of n=3 of over 30 cells per experiment; \**P*<0.05, \*\**P*<0.01; one-way ANOVA).
- (E) Examination of IP3R1 enrichment in crude mitochondria isolated from siCon/siPDK4 transfected C2C12 myotubes after incubating with 0.4mM Pal/BSA for 16 h. (Below) Quantification (Mean ±SD of n=3; \**P*<0.05, \*\**P*<0.01; one-way ANOVA).
- (F) Representative TEM images of subsarcolemmal (SS) mitochondria in gastrocnemius muscle isolated from CD or HFD-fed WT and *Pdk4*<sup>-/-</sup> mice.
- (G) Representative TEM images of ER-mitochondria contacts in primary myoblast isolated from WT or *Pdk4*<sup>-/-</sup> mice after stimulating 0.4mM Pal/BSA for 16 h. (Scale Bars, 500nm).
- (H) Number of mitochondria linked with ER in total number of mitochondria in each microscopic field (n=10/group; Mean ±SD, \**P*<0.05, \*\**P*< 0.01; one-way ANOVA).
- (I) Percentage of MAM surface area per mitochondrion perimeter in each microscopic field n=20/group; Mean ±SD, \*\*\**P*< 0.001; one-way ANOVA).
- (J) Evaluation of mitochondrial dynamics-related proteins in WT and *Pdk4*<sup>-/-</sup> mice. (Right) Quantification (Mean ±SD of n=3/group; Student's t test).
- (K) Evaluation of mitochondrial dynamics related proteins in C2C12 myotubes transfected with siCon/siPDK4. (Right) Quantification (Mean ±SD of n=3; Student's t test).
- (L) TEM images showing the mitochondria morphology in gastrocnemius muscle isolated from WT and *Pdk4*<sup>-/-</sup> mice (Scale Bars, 2µm). (Right) Total mitochondria perimeter (µm) and mitochondrial perimeter of SS and IMF (µm) (n=74~123).
- (M) OCR level was measured in primary myotubes isolated from WT/ *Pdk4*<sup>-/-</sup> mice gastrocnemius.
- (N) Quantification of Figure M.

SUPPLEMENTARY DATA

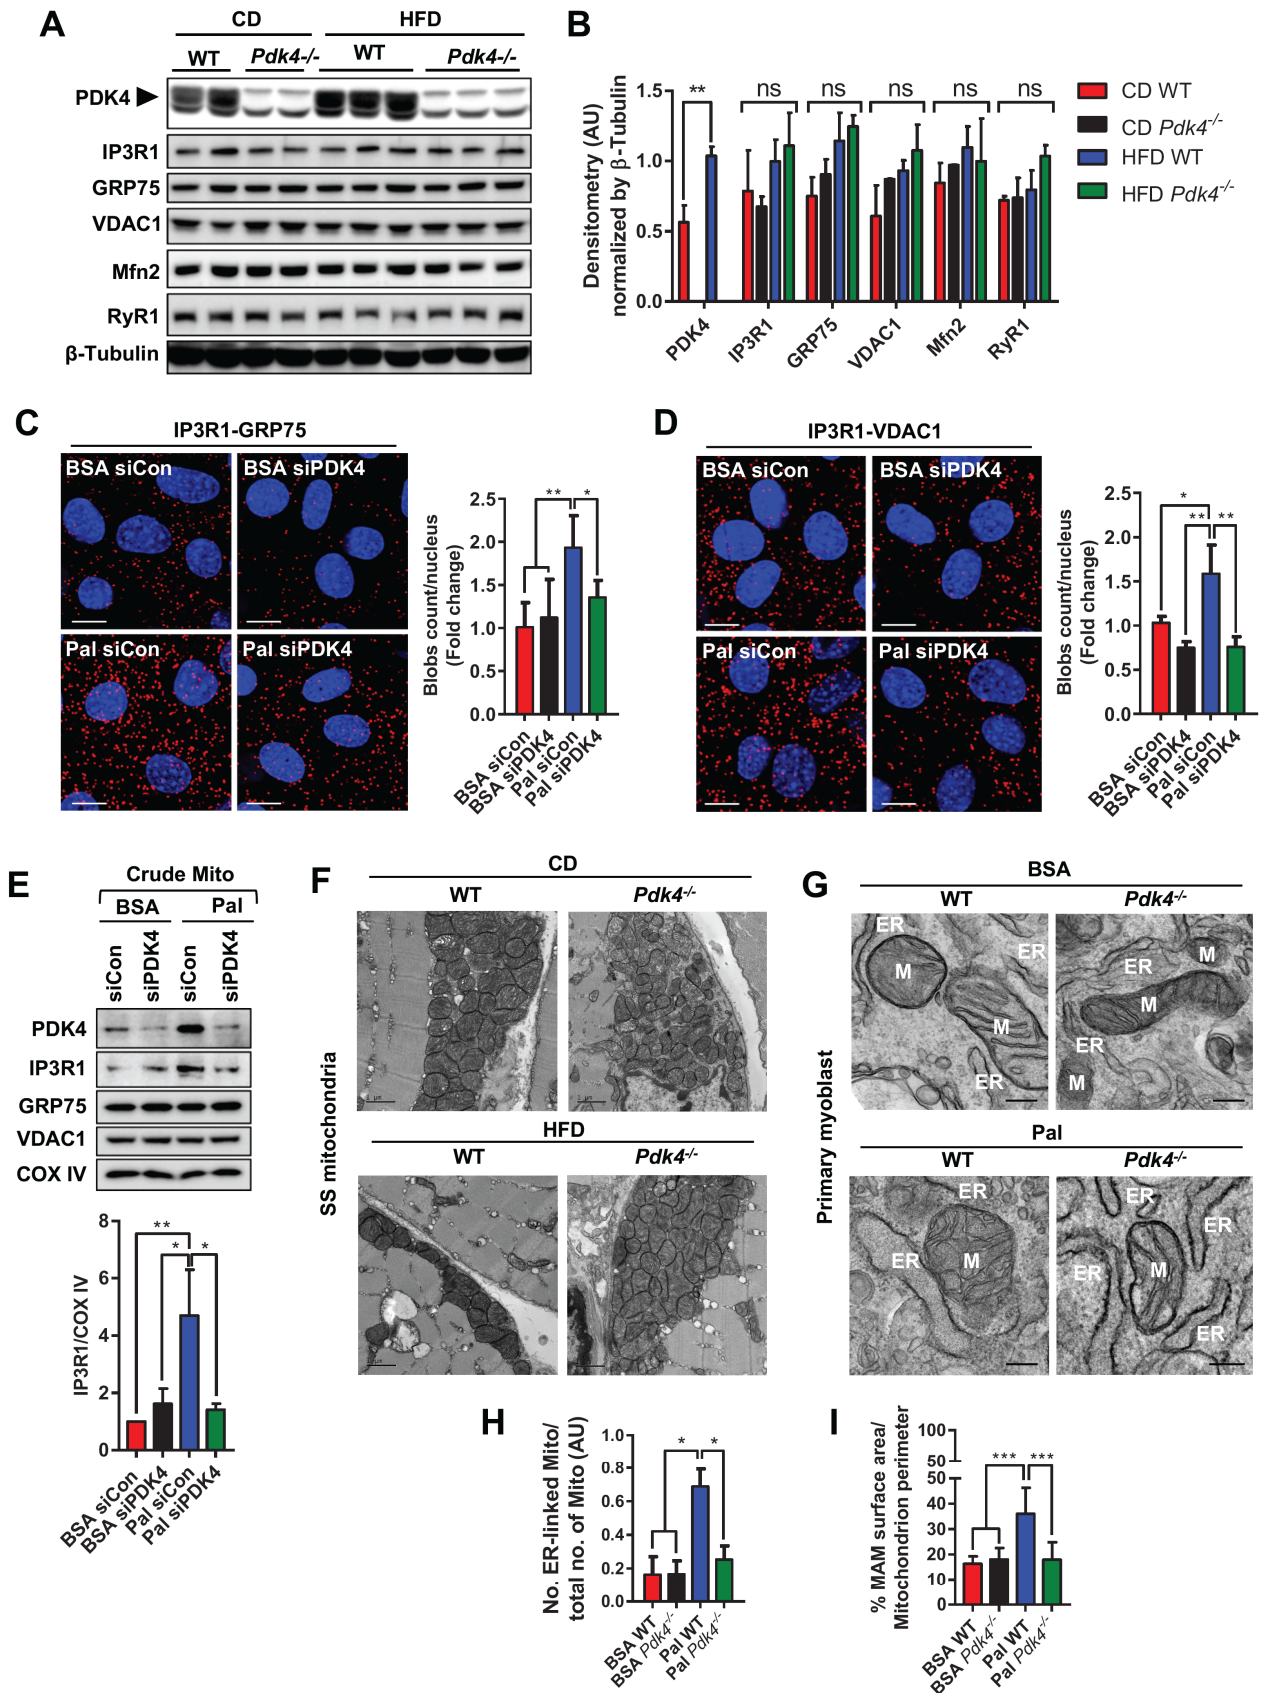



SUPPLEMENTARY DATA

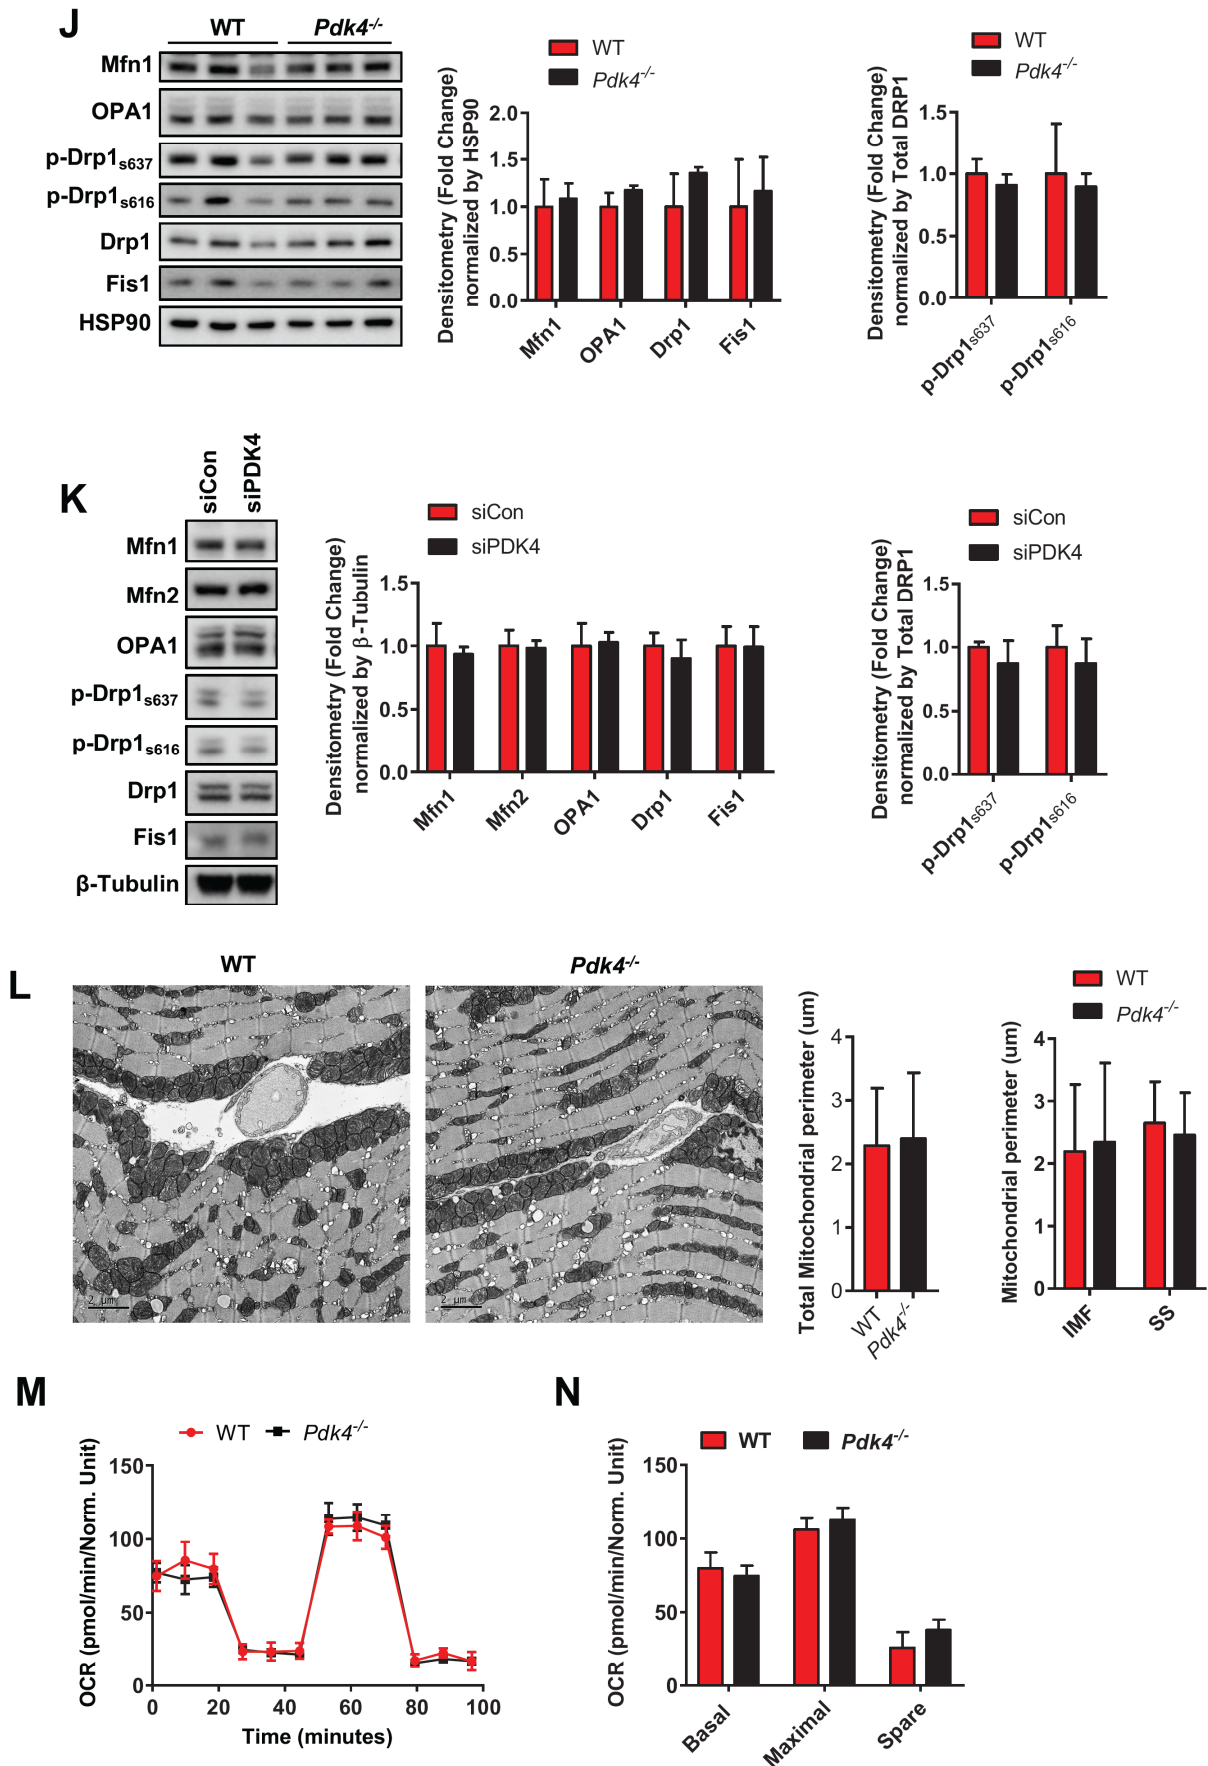

## SUPPLEMENTARY DATA

### **Supplementary Figure S5. Attenuation of MAM formation prevented palmitate-induced mitochondrial dysfunction, ER stress and insulin resistance, Related to Figure 5.**

A) Mitochondrial ROS generation measurement in siCon/siIP3R1/siGRP75 transfected C2C12 myotubes after incubating with 0.4mM Pal/BSA for 16 h using CM-H2XRos normalized by MitoTracker green FM (Mean  $\pm$ SD of n=2, \* $P$ <0.05, \*\* $P$ < 0.01; one-way ANOVA).

B) Cellular ATP was measured in siCon/siIP3R1/siGRP75 transfected C2C12 myotubes after incubating with 0.4mM Pal/BSA for 16 h by ATPlite luminescence assay. (n=3; Mean  $\pm$ SD, \* $P$ <0.05, \*\* $P$ <0.01; one-way ANOVA).

C) Immunoblot of mitochondrial total OXPHOS-complex proteins in gastrocnemius muscle isolated from 16weeks CD or HFD-fed WT and *Pdk4*<sup>-/-</sup> mice.

(D) Quantification of figure C (Mean  $\pm$ SD of n=6/group; ns – no significance; one-way ANOVA)

(E-F) Palmitate induced ER stress was analyzed by immunoblot in IP3R1 or GRP75 knockdown C2C12 myotubes. (Right) Quantifications (Mean  $\pm$ SD of n=3, \* $P$ <0.05, \*\* $P$ <0.01; one-way ANOVA).

(G) siCon/siPDK4 transfected C2C12 myotubes were incubated with 0.25 $\mu$ M Tg (thapsigargin) at different time points (hour – h) and examined the ER stress markers by immunoblot.

(H-K) Quantification of figure G (Mean  $\pm$ SD of n=2, \* $P$ <0.05, \*\* $P$ <0.01; one-way ANOVA).

(L) IP3R1 and VDAC1 interaction were examined by *in situ* PLA in siCon/siPDK4 transfected C2C12 myotubes after incubating with 0.25 $\mu$ M Tg for 6 h (Scale Bars, 20 $\mu$ m). (Right) *in situ* PLA blobs quantification (Mean  $\pm$ SD of more than 30 cells per condition; \*\* $P$ <0.01; one-way ANOVA).

(M) C2C12 myotubes were transfected or transduced with siGRP75 or adeno virus (Ad) PDK4 or both siGRP75 and adPDK4 followed by treatment of 0.25 $\mu$ M Tg for 6 h. ER stress marker, CHOP expression was evaluated by immunoblot. (Below) Quantification (Mean  $\pm$ SD of n=2, \* $P$ <0.05, \*\* $P$ <0.01; one-way ANOVA).

(N) Schematic representation, showing that PDK4 enhances Tg-induce ER stress through induction of MAM formation, possibly via a feedback mechanism induced by enhanced generation of mitochondria ROS. Whereas, suppression of PDK4 reduces Tg-induced ER stress by attenuating MAM formation

SUPPLEMENTARY DATA

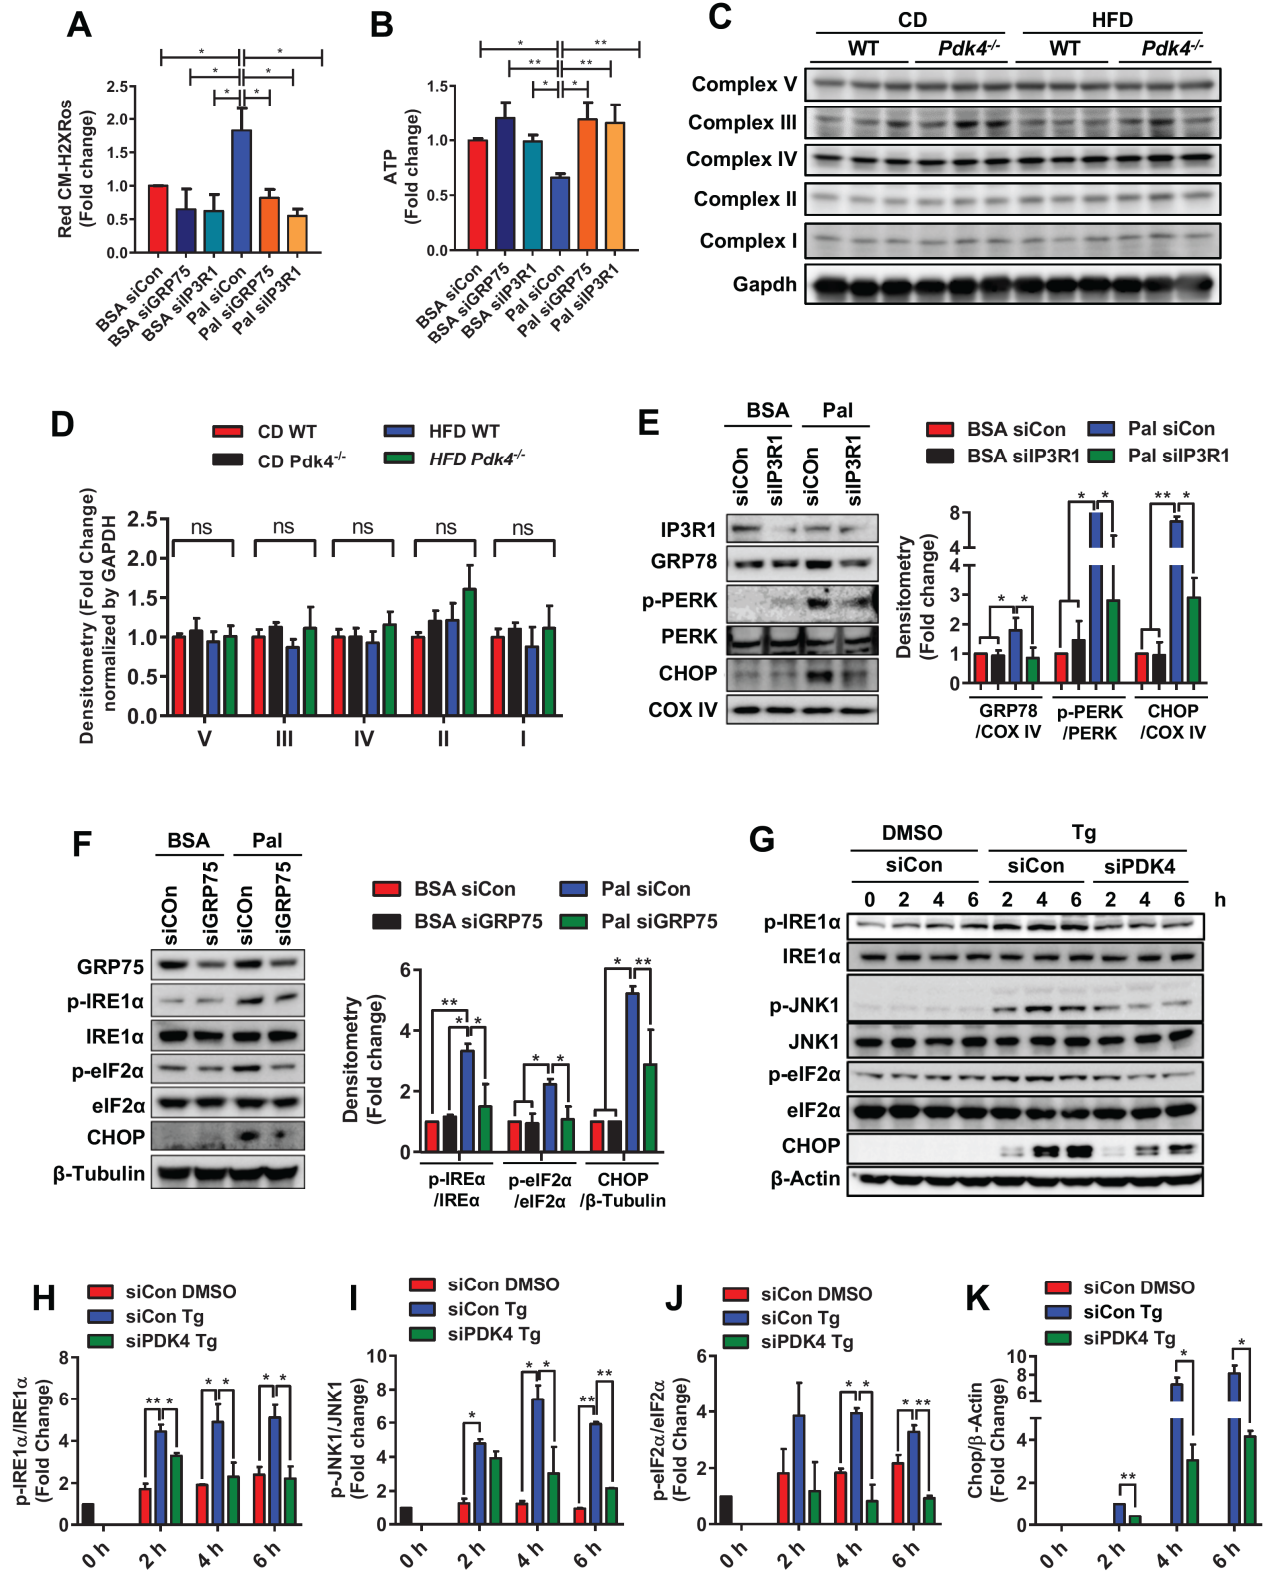

SUPPLEMENTARY DATA

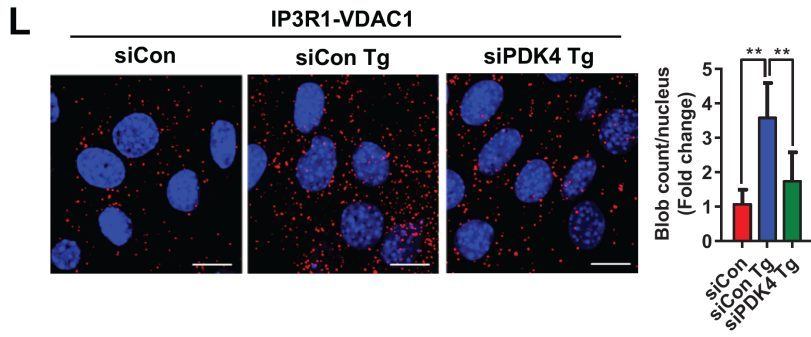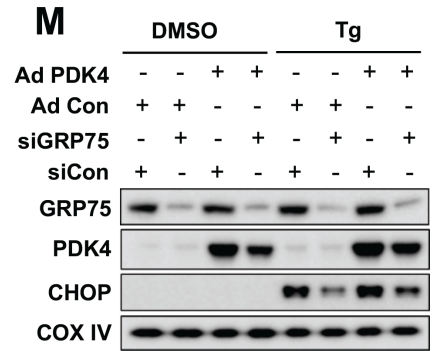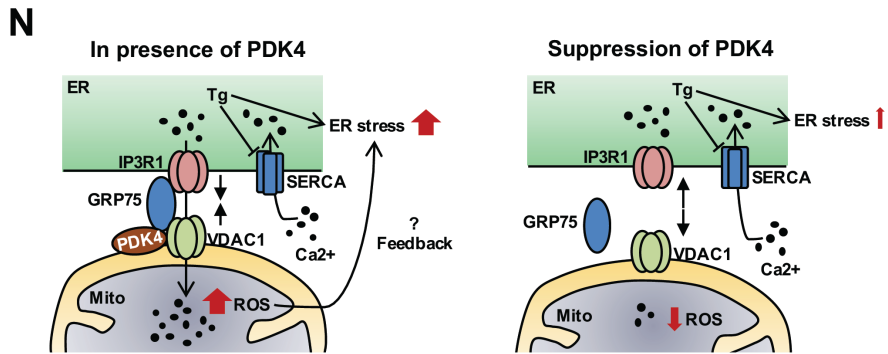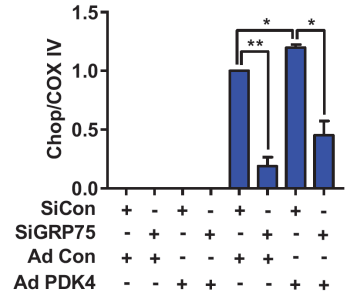

SUPPLEMENTARY DATA

**Supplementary Figure S6. MAM suppression protects from palmitate-induced insulin resistance, Related to Figure 6.**

(A) & (C) JNK phosphorylation was analyzed in siCon/siIP3R1/siGRP75 transfected C2C12 myotubes after incubating with 0.4mM BSA/Pal for 16 h by immunoblot. (Below) Quantification of each respective figures (Mean  $\pm$ SD of n=3; \* $P$ <0.05, \*\* $P$ <0.01; one-way ANOVA)

(B) & (D) Insulin-stimulated AKT phosphorylation was evaluated in siIP3R1/siGRP75 transfected C2C12 myotubes after incubating with 0.4mM BSA/Pal for 16 h (Below) Quantification of each respective figures (Mean  $\pm$ SD of n=3; \* $P$ <0.05, \*\* $P$ <0.01; one-way ANOVA)

(E) Mock or Linker-RH was transduced in C2C12 myotubes and JNK phosphorylation was examine by immunoblot. (Below) Quantification (Mean  $\pm$ SD of n=3; \*\* $P$ <0.01; Student's t test)

(F) AKT phosphorylation was evaluated by immunoblot in mock or Linker-RH overexpressing C2C12 myotubes. (Below) Quantification (Mean  $\pm$ SD of n=3; \*\* $P$ <0.01; Student's t test)

(G) Immunoblot analysis after mock or Linker-RH transduction in control or PDK4 knockdown C2C12 myotubes. (Right) Quantification (Mean  $\pm$ SD of n=3; \* $P$ <0.05; one-way ANOVA)

(H) Insulin-stimulated AKT phosphorylation was evaluated after mock or Linker-RH transduction in control or PDK4 knockdown C2C12 myotubes. (Right) Quantification (Mean  $\pm$ SD of n=3; \*\* $P$ <0.01; one-way ANOVA)

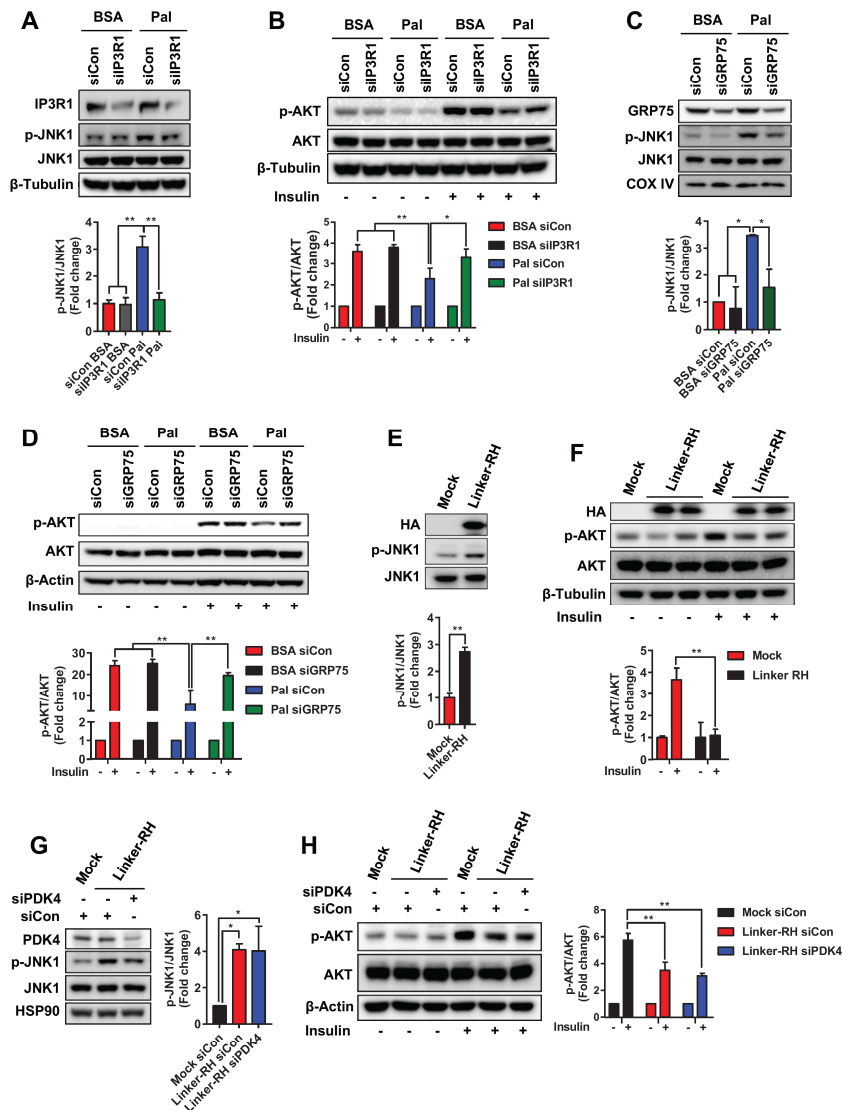

SUPPLEMENTARY DATA

**Supplementary Table S1. Antibody information**

| Antibody Name        | Provider       | Catalog No. | Application       | Dilution           |
|----------------------|----------------|-------------|-------------------|--------------------|
| IP3R1                | Santa Cruz     | sc-28614    | IB/in situ PLA    | 1:1000/1:50        |
| GRP75                | Santa Cruz     | sc-133137   | IB/in situ PLA/IP | 1:1000/1:100/1:100 |
| PERK                 | Santa Cruz     | sc-13073    | IB                | 1:1000             |
| PDK2                 | Santa Cruz     | sc-100534   | IB/in situ PLA    | 1:1000/1:50        |
| PGC1 $\alpha$        | Santa Cruz     | sc-5816     | IB                | 1:1000             |
| GRP78                | Santa Cruz     | sc-1050     | IB                | 1:1000             |
| eIF2 $\alpha$        | Santa Cruz     | sc-11386    | IB                | 1:1000             |
| Fis1                 | Santa Cruz     | sc-98900    | IB                | 1:1000             |
| VDAC1                | Santa Cruz     | sc-390996   | IB/in situ PLA    | 1:1000/1:100       |
| Drp1                 | Santa Cruz     | sc-271583   | IB                | 1:1000             |
| VDAC1                | Abcam          | ab14734     | IB/in situ PLA    | 1:1000/1:100       |
| COX IV               | Abcam          | ab16056     | IB                | 1:1000             |
| IP3R1                | Abcam          | ab166871    | IB/in situ PLA    | 1:1000/1:100       |
| PPAR $\alpha$        | Abcam          | ab2779      | IB                | 1:1000             |
| p-IRE1 $\alpha$      | Abcam          | ab4817      | IB                | 1:1000             |
| Mfn1                 | Abcam          | ab57602     | IB                | 1:1000             |
| Total Oxphos-Complex | Abcam          | ab110413    | IB                | 1:1000             |
| PDI                  | Abcam          | ab2792      | IB                | 1:1000             |
| Ryr1                 | Cell signaling | #8153       | IB                | 1:1000             |
| PDK1                 | Cell signaling | #3820       | IB                | 1:1000             |
| Flag                 | Cell signaling | #2368       | IB/in situ PLA    | 1:1000/1:100       |
| PDHE1 $\alpha$       | Cell signaling | #3205       | IB/in situ PLA    | 1:1000/1:100       |
| Mfn2                 | Cell signaling | #9482       | IB                | 1:1000             |
| p-Drp1 s616          | Cell signaling | #3455       | IB                | 1:1000             |
| p-Drp1 s637          | Cell signaling | #4867       | IB                | 1:1000             |
| PPAR $\gamma$        | Cell signaling | #2435       | IB                | 1:1000             |
| p-Foxo1              | Cell signaling | #9461       | IB                | 1:1000             |
| Foxo1                | Cell signaling | #2880       | IB                | 1:1000             |
| p-PERK               | Cell signaling | #3179       | IB                | 1:1000             |
| IRE1 $\alpha$        | Cell signaling | #3294       | IB                | 1:1000             |
| p-eIF2 $\alpha$      | Cell signaling | #9721       | IB                | 1:1000             |
| p-JNK                | Cell signaling | #9251       | IB                | 1:1000             |
| Chop                 | Cell signaling | #2895       | IB                | 1:1000             |
| JNK                  | Cell signaling | #9252       | IB                | 1:1000             |
| p-AKT                | Cell signaling | #9271       | IB                | 1:1000             |
| AKT                  | Cell signaling | #2920       | IB                | 1:1000             |
| HSP90                | Cell signaling | #4874       | IB                | 1:1000             |
| GAPDH                | Cell signaling | #2118       | IB                | 1:1000             |
| HA                   | Cell signaling | #2367       | IB                | 1:1000             |
| p-PDH s232           | Calbiochem     | AP1063      | IB                | 1:10000            |
| p-PDH s293           | Calbiochem     | AP1062      | IB                | 1:10000            |
| p-PDH s300           | Calbiochem     | AP1064      | IB                | 1:10000            |
| $\beta$ -tubulin     | ABM            | AMB-G098    | IB                | 1:1000             |
| $\beta$ -Actin       | Sigma          | A5441       | IB                | 1:2000             |
| Flag                 | Sigma          | F1804       | IB/in situ PLA    | 1:10000/1:500      |
| p-IRS-1              | Upstate        | 07-247      | IB                | 1:1000             |
| IRS-1                | Upstate        | 06-248      | IB                | 1:1000             |
| PCNA                 | BD biosciences | #610664     | IB                | 1:1000             |
| OPA1                 | BD biosciences | #612606     | IB                | 1:1000             |
| PDK3                 | Anti-serum     | NA          | IB                | 1:1000             |
| PDK4                 | Anti-serum     | NA          | IB                | 1:1000             |
